# Supplementary material
Source: publisher site journal article supplement (https://www.dovepress.com/article/457429)
Supplement: Supplementary file 1 [file get_supplementary_file.php]

## Appendix 1

### Face-to-Face Interview Guide for SRCA Administrators and Physicians

Q1: Which mode of prehospital transportation do you prefer? (choose one)

- Load and Go
- Stay and Play

Please explain the reasons for your choice:

Q2: Which of the following choices best describes your familiarity with the ultrasound machine?

- I have no familiarity with it.
- I have heard of it.
- I have seen it used.
- I have used it.
- I use it regularly.

Q3: Based on your familiarity with the ultrasound, what do you think will be the impact of equipping the Saudi Red Crescent ambulances with ultrasound equipment to diagnose trauma patients in the prehospital setting?

Q4: If an initiative to equip the Saudi Red Crescent with prehospital ultrasound was implemented, what role do you think the National Guard Hospital's Emergency Department would play?

Q5: What do you think would be the main barriers to the potential implementation of prehospital ultrasound at the Saudi Red Crescent? Why would these be barriers?

Q6: Which current policies and protocols in the Emergency Department at the National Guard Hospital might act as barriers to the implementation of prehospital ultrasound in the

Saudi Red Crescent?

Q7: How does the paramedics' prehospital work contribute to or hinder the work of physicians and administrators in the Emergency Department at the National Guard Hospital?

Q8: How confident are you in the ability of the Saudi Red Crescents' paramedics and EMT's to learn to use an ultrasound and then accurately diagnose a trauma patient in the prehospital setting?

## Appendix 2

### Paramedics and EMTs Online Survey

Q1: Which mode of prehospital transportation do you prefer? (Choose one)

- Load and Go
- Stay and Play

Please explain the reasons for your choice:

Q2: Please choose the phrase below that best describes your familiarity with the ultrasound machine:

- I have no familiarity with it.
- I have heard of it.
- I have seen it used.
- I have used it.

Q3: Based on your familiarity with the ultrasound, what do you think will be the impact of equipping the Saudi Red Crescent ambulances with ultrasound machines to diagnose trauma patients in the prehospital setting?

Q4: If we implemented pre-hospital ultrasound in the Saudi Red Crescent, what role do you think the National Guard Hospital's Emergency Department would play?

Q5: What do you think would be the main barriers to the potential implementation of prehospital ultrasound in the Saudi Red Crescent? Please explain why these would be barriers?

Q6: Which current policies and protocols in the Saudi Red Crescent might act as barriers to the implementation of prehospital ultrasound?

Q7 (Paramedics): How does your work in the prehospital setting contribute to the work of the Emergency Room physicians at the National Guard Hospital?

Q8: How confident are you in your ability to learn to use the ultrasound to accurately diagnose a trauma patient in the prehospital setting?

Q9: How confident are you in the ability of the paramedics and EMTs in the Saudi Red Crescent to learn to use an ultrasound and then accurately diagnose a trauma patient in the prehospital setting?

Demographic Information:

1. Which type of certificate do you hold?

- EMT Basic
- EMT Intermediate
- Paramedic

2. How many years of experience do you have with the Saudi Red Crescent?

- Less than 2 years
- 3 to 5 years
- 6 to 8 years
- 9 to 11 years
- 12 to 15 years
- more than 15 years

3. How frequently have you transported a trauma patient to the National Guard Hospital?

- a. Never
- b. 5 to 10 times
- c. 11 to 20 times
- d. 21 to 50 times
- e. 51 to 75 times
- f. 76 to 100 times
- g. more than 100 times
